# Supplementary material for: Impact of COVID-19 shocks, precarity and mediating resources on the mental health of residents of share housing in Victoria, Australia: an analysis of data from a two-wave survey
Source: HighWire-hosted journal article supplement (doi:10.1136/bmjopen-2021-058580), 2022-04-01
Supplement: bmjopen-2021-058580supp001_data_supplement.pdf [file bmjopen-2021-058580supp001_data_supplement.pdf]

## Appendix Figures and Tables

Appendix Table A.1 Summary of the Survey Instrument

| Q  | Field                                  | Question                                                | Measures/ Answers                                                                                                                                                                              | Survey logic                                                                        |
|----|----------------------------------------|---------------------------------------------------------|------------------------------------------------------------------------------------------------------------------------------------------------------------------------------------------------|-------------------------------------------------------------------------------------|
| 1  | Housing Situation – screening question | What is your housing situation?                         | I currently live in a share house/ I have previously lived in a share house in 2020, but no longer do now/ Neither of the above                                                                | Selecting ‘Neither of the above’ terminated the survey                              |
| 2  | Location screening question            | Where do you live?                                      | I currently live in Victoria/ I have lived in Victoria in 2020, but do not live there anymore/ I have not lived in Victoria at any point in 2020                                               | Selecting ‘I have not lived in Victoria at any point in 2020’ terminated the survey |
| 3  | Location                               | What is your current postcode?                          | Drop down menu                                                                                                                                                                                 |                                                                                     |
| 4  | Age                                    | What year were you born?                                | Drop down menu                                                                                                                                                                                 |                                                                                     |
| 5  | Country of origin                      | What is your country of birth?                          | Drop down menu with top 20 most common countries of origin in Australia then ‘other’                                                                                                           |                                                                                     |
| 6  | Gender                                 | What is your gender                                     | Male/ female/ non-binary/ prefer not to say                                                                                                                                                    |                                                                                     |
| 7  | Citizenship                            | Which of the following best describes you?              | Citizen of Australia or New Zealand/ Permanent resident of Australia/ Visa Holder                                                                                                              |                                                                                     |
| 8  | Visa Purpose                           | What is the primary purpose of your stay in Australia?  | Skilled work/ Holiday/ Working holiday/ Study/ Joining family/ Humanitarian protection                                                                                                         | Question only shown to those who selected ‘Visa holder’ in Q7                       |
| 9  | Indigeneity                            | Are you of Aboriginal or Torres Strait Islander origin? | Aboriginal/ Torres Strait Islander/ Aboriginal and Torres Strait Islander/ Not Aboriginal or Torres Strait Islander                                                                            | Only shown to those who selected ‘Citizen of Australia or New Zealand’ in Q7        |
| 10 | Education                              | What is your highest level of education?                | Year 10 or below/ Year 11 or equivalent/ Year 12 or equivalent/ Trade or Apprenticeship/ Other TAFE or technical certificate/ Diploma/ Bachelor degree/ Postgraduate degree/ prefer not to say |                                                                                     |
| 11 | Employment status                      | What is your current employment status                  | Working 35 hours or more per week / Working less than 35 hours per week and happy with hours/ Working less than 35                                                                             | Only shown to those who indicated they                                              |

|    |                        |                                                                                                                     |                                                                                                                                                                                                                                                                                                                                                                                                                                                                                                                                                                         |                                                                                                                        |
|----|------------------------|---------------------------------------------------------------------------------------------------------------------|-------------------------------------------------------------------------------------------------------------------------------------------------------------------------------------------------------------------------------------------------------------------------------------------------------------------------------------------------------------------------------------------------------------------------------------------------------------------------------------------------------------------------------------------------------------------------|------------------------------------------------------------------------------------------------------------------------|
|    |                        |                                                                                                                     | hours a week but want more hours / Not working, looking for work / Not working, not looking for work / Prefer not to say                                                                                                                                                                                                                                                                                                                                                                                                                                                | were currently working in Q10                                                                                          |
| 12 | Industry of employment | Which of the following industries best describes your main job?                                                     | Accommodation and Food Services / Administrative and Support Services / Agriculture, Forestry and Fishing / Arts and Recreation Services / Construction / Education and Training/ Electricity, Gas, Water and Waste Services / Financial and Insurance Services / Health Care and Social Assistance / Information Media and Telecommunication / Manufacturing / Mining/ Professional, Scientific and Technical Services / Public Administration and Safety/ Rental, Hiring and Real Estate Services / Retail Trade / Transport, Postal and Warehousing/ Wholesale Trade |                                                                                                                        |
| 13 | Employment Change      | Has your work situation changed since COVID-19 was declared as a pandemic?                                          | Yes/ No                                                                                                                                                                                                                                                                                                                                                                                                                                                                                                                                                                 |                                                                                                                        |
| 14 | Employment Change      | What has changed?                                                                                                   | My hours have reduced / My hours have increased / My employment has been permanently terminated or temporarily paused/ Other                                                                                                                                                                                                                                                                                                                                                                                                                                            | Only shown to those that selected 'yes' in Q13                                                                         |
| 15 | Employment contract    | What kind of employment contract do you have in your main job?                                                      | Permanent (employed on an on-going basis) or fixed term with a contract of at least 2 years / Fixed term with a contract of less than 2 years / Casual / Self-employed/ Prefer not to say                                                                                                                                                                                                                                                                                                                                                                               | Only shown to those who indicated they were currently working in Q10                                                   |
| 16 | Employment Status      | What kind of employment contract did you have in your main job prior to COVID-19 disruptions?                       | Permanent (employed on an on-going basis) or fixed term with a contract of at least 2 years / Fixed term with a contract of less than 2 years / Casual / Self-employed/ Prefer not to say                                                                                                                                                                                                                                                                                                                                                                               | Only shown to those who indicated that their 'employment has been permanently terminated or temporarily paused' in Q14 |
| 17 | Salary                 | Would you find it easier to calculate your average weekly take-home pay (post-tax) or your annual salary (pre tax)? | Weekly take-home pay (after tax)/ Annual salary (before tax)                                                                                                                                                                                                                                                                                                                                                                                                                                                                                                            |                                                                                                                        |
| 18 | Salary                 | What is your average weekly take-home pay (after tax)? (include                                                     | Drop down menu of income brackets                                                                                                                                                                                                                                                                                                                                                                                                                                                                                                                                       | Shown to those that selected                                                                                           |

|    |                    |                                                                                                                                                                                |                                                                                                                                                                                                                                                                          |                                                                     |
|----|--------------------|--------------------------------------------------------------------------------------------------------------------------------------------------------------------------------|--------------------------------------------------------------------------------------------------------------------------------------------------------------------------------------------------------------------------------------------------------------------------|---------------------------------------------------------------------|
|    |                    | salary, any government payments, dividends and additional income like child support)                                                                                           |                                                                                                                                                                                                                                                                          | 'weekly take-home pay' in Q17                                       |
| 19 | Salary             | What is your annual salary (before tax)? (include salary, any government payments, dividends and additional income like child support)                                         | Drop down menu of income brackets                                                                                                                                                                                                                                        | Shown to those that selected 'annual salary' in Q17                 |
| 20 | Work expectations  | How likely do you think it is that you will lose all or most of your work by October 2020?                                                                                     | 5 point Likert scale from 'extremely likely' to 'extremely unlikely'                                                                                                                                                                                                     | Shown to those that indicated they are currently working in Q10     |
| 21 | Work expectations  | How likely do you think it is that you will gain employment by October 2020?                                                                                                   | 5 point Likert scale from 'extremely likely' to 'extremely unlikely'                                                                                                                                                                                                     | Shown to those that indicated they are not currently working in Q10 |
| 22 | Living expenses    | In the last 12 months, how difficult was it for you to meet your necessary cost of living expenses like housing, electricity, water, health care, food, clothing or transport? | 5 point Likert scale from 'extremely easy' to 'extremely difficult'                                                                                                                                                                                                      |                                                                     |
| 23 | Financial hardship | Have you done any of the following in the last 12 months?                                                                                                                      | No/ Yes, since March 2020/ Yes, prior to March 2020 for<br><br>Sought assistance from a charity organization/ Pawned or sold anything because you needed cash/ Went without meals to afford other necessities/ Could not pay the mortgage or rent on time/ Used afterpay |                                                                     |
| 24 | Savings            | What is the approximate balance of your total savings?                                                                                                                         | Less than \$500/ \$500 - \$2,999/ \$3,000 - \$4,999 / \$5,000 - \$10,000/ More than \$10,000                                                                                                                                                                             |                                                                     |
| 25 | Debt               | What is your current level of debt?                                                                                                                                            | I have more debts than I can pay back/ I have debts that I am just managing to pay back / I have debts that I am managing to pay back comfortably / I have no debts                                                                                                      |                                                                     |

|    |                               |                                                                                                                            |                                                                                                                                                                                                                                                                                                           |
|----|-------------------------------|----------------------------------------------------------------------------------------------------------------------------|-----------------------------------------------------------------------------------------------------------------------------------------------------------------------------------------------------------------------------------------------------------------------------------------------------------|
| 26 | Change in financial situation | Since COVID-19, has your financial situation                                                                               | 5 point Likert scale from 'become dramatically better' to 'become dramatically worse'                                                                                                                                                                                                                     |
| 27 | Life satisfaction             | How satisfied are you with your life in general?                                                                           | 5 point Likert scale from 'extremely satisfied' to 'extremely dissatisfied'                                                                                                                                                                                                                               |
| 28 | Mental health                 | Overall, would you say your mental health is                                                                               | 5 point Likert scale from 'excellent' to 'terrible'                                                                                                                                                                                                                                                       |
| 29 | General health                | Overall, would you say your general health is                                                                              | 5 point Likert scale from 'excellent' to 'terrible'                                                                                                                                                                                                                                                       |
| 30 | Mental health change          | Since COVID-19 isolation rules were introduced, would you say that your mental health has                                  | 5 point Likert scale from 'become dramatically better' to 'become dramatically worse'                                                                                                                                                                                                                     |
| 31 | Housing change                | Have your living arrangements changed since COVID-19?                                                                      | Nothing has changed / I have moved back in with family/ I have moved in with my partner/ I have moved into a (different) shared living arrangement / Additional occupants have moved in (more people now live in my home)/ Occupants have left (less people now live in my home)/ Other (please describe) |
| 32 | Reason for housing change     | Why did you make this change?                                                                                              | Open text                                                                                                                                                                                                                                                                                                 |
| 33 | Occupants                     | How many people live in your home? (include yourself and everyone who spends most nights of the week staying in your home) | Drop down menu 2 – 8+                                                                                                                                                                                                                                                                                     |
| 34 | Tenure                        | What is your current housing situation?                                                                                    | Living in a short-term rental (e.g. no lease or a lease of less than 6 months)/ Living in a rental property with a lease of 6 months or more / Living in a home that I own/ Living with parents/ Other                                                                                                    |
| 35 | Landlord                      | I rent from                                                                                                                | A landlord or real estate agent/ A flatmate/ A family I know/ A family I don't know/ Other<br>Shown to those that selected 'lease than 6 months' or 'lease of 6 months or more' in Q34                                                                                                                    |
| 36 | Housing cost                  | What is your personal weekly rent or mortgage payment                                                                      | Drop down menu in \$100 increments                                                                                                                                                                                                                                                                        |

|    |                          |                                                                                                                                                       |                                                                                                                                                                                                                                                                                                                                                                                                        |                                             |
|----|--------------------------|-------------------------------------------------------------------------------------------------------------------------------------------------------|--------------------------------------------------------------------------------------------------------------------------------------------------------------------------------------------------------------------------------------------------------------------------------------------------------------------------------------------------------------------------------------------------------|---------------------------------------------|
| 37 | Bedrooms                 | How many bedrooms are there in your home?                                                                                                             | Drop down menu of 0 – 5+                                                                                                                                                                                                                                                                                                                                                                               |                                             |
| 38 | Housing crowding stress  | In the past month, how often have you                                                                                                                 | 5 points from 'all the time to 'never' for Felt nervous and stressed about how crowded your home is/ felt concerned about your ability to effectively use your home to do the things you need to do (ie work, sleep, enjoy free time/ been angry because you didn't have enough privacy or personal space for yourself at home                                                                         |                                             |
| 39 | Housemate relations      | Since COVID-19 isolation rules were introduced, would you say that your relationships with other members of your household have                       | 5 point Likert scale from 'become dramatically better' to 'become dramatically worse'                                                                                                                                                                                                                                                                                                                  |                                             |
| 40 | Legal rights             | How confident do you feel about knowing and protecting your legal rights as a renter?                                                                 | 5 point Likert scale from 'extremely confident' to 'not at all confident'                                                                                                                                                                                                                                                                                                                              |                                             |
| 41 | Future housing costs     | How confident are you that you will be able to meet your housing costs over the next 6 months?                                                        | 5 point Likert scale from 'extremely confident' to 'not at all confident'                                                                                                                                                                                                                                                                                                                              |                                             |
| 42 | Access to support        | Please indicate if you have accessed any of the following resources in response to COVID-19 (please select all that apply)                            | Government support/ The COVID-19 rent relief grant / International Students Emergency Relief Fund/ Financial support from family or friends / Financial support from an employer/ Financial support from a housemate / Financial support from a religious group or charity/ Accessed personal savings/ Accessed superannuation/ Took out a personal loan/ Sought mortgage payment relief/<br><br>Other |                                             |
| 43 | Effectiveness of support | The resources I have accessed in response to COVID-19 are sufficient to make a substantial difference to my financial security over the next 3 months | 5 point Likert scale from 'strongly agree' to 'strongly disagree'                                                                                                                                                                                                                                                                                                                                      | Shown to those that received support in Q42 |
| 44 | Social support           | Do you have a support network (family, friends, community) that can                                                                                   | Yes/ no                                                                                                                                                                                                                                                                                                                                                                                                |                                             |

|    |                    |                                                                                                                                            |                                                                                                                                                                                                                                                                      |                                          |
|----|--------------------|--------------------------------------------------------------------------------------------------------------------------------------------|----------------------------------------------------------------------------------------------------------------------------------------------------------------------------------------------------------------------------------------------------------------------|------------------------------------------|
|    |                    | help you in situations of financial hardship?                                                                                              |                                                                                                                                                                                                                                                                      |                                          |
| 45 | Social support     | The following people/ organisations have worked very hard to support me during COVID-19                                                    | 5 points from 'strongly agree' to 'strongly disagree' for me/ my family/ my work place/ the government/ my friends/ charities/ community groups                                                                                                                      |                                          |
| 46 | Social support     | How often have you felt you had access to the following support over the last 3 months? This support could be given in-person or virtually | 5 points from 'all the time to 'never' for Someone you can count on to listen to you when you need to talk/ Someone to give you information to help you understand a situation/ Someone to help with daily chores if you were sick/ Someone to have a good time with |                                          |
| 47 | Rental negotiation | Have you attempted to renegotiate your rent in response to COVID-19?                                                                       | No / Yes, and rent was reduced / Yes, but rent was not reduced/ Negotiations are still in progress                                                                                                                                                                   |                                          |
| 48 | Rental negotiation | Why didn't you attempt to renegotiate your rent?                                                                                           | I don't need to/ I don't know how or don't feel comfortable doing it / I don't qualify / I am worried I will be forced to leave if I do/ Other                                                                                                                       | Shown to those that selected 'no' in Q47 |
| 49 | Rental negotiation | Can you please explain the outcome of this negotiation?                                                                                    | Text input                                                                                                                                                                                                                                                           |                                          |
| 50 | Open ended         | Is there anything else you would like people to know about the experiences of residents of share houses during COVID-19?                   | Text input                                                                                                                                                                                                                                                           |                                          |

**Appendix Table A2: Summary statistics, sample mean by survey wave.**

|                                                                                                                                     | Baseline (June 2020) | Follow-up (October 2020) | Median in Australian share houses |
|-------------------------------------------------------------------------------------------------------------------------------------|----------------------|--------------------------|-----------------------------------|
| Age (average years, range)                                                                                                          | 34, 19-74            |                          | 35                                |
| Female (%)                                                                                                                          | 55.67                |                          | 45                                |
| Migrant (%)                                                                                                                         | 21.33                |                          | 39                                |
| Low Education (%)                                                                                                                   | 16.00                |                          |                                   |
| Median Weekly Income                                                                                                                | \$650                |                          | \$760                             |
| Mental health worsening (%)                                                                                                         | 18.33                | +2                       |                                   |
| Number of people in the household (average number, range)                                                                           | 3, 2-6               | 3, 2-7                   |                                   |
| <u>Pre-existing social conditions:</u>                                                                                              |                      |                          |                                   |
| Housing precarity (%) (paying more than 30% of income on housing costs and/or renting in the informal market).                      | 65.17                |                          |                                   |
| Employment precarity (%) (casually employed or unemployed)                                                                          | 35.50                |                          |                                   |
| Double precarity (%) (experiencing both housing and employment precarity simultaneously)                                            | 28.50                |                          |                                   |
| <u>Changing social conditions:</u>                                                                                                  |                      |                          |                                   |
| Covid shocks (%) (people moving in or out of household, decreased earnings, inability to cover housing and other living costs)      | 74.00                | -4.33                    |                                   |
| Housing inadequacy (%) (feeling stressed about overcrowding, concerned about ability to use the house, angry about lack of privacy) |                      | 31.33                    |                                   |
| Accessed government support (%)                                                                                                     | 67.33                | -9.33                    |                                   |
| Sufficiency of government support (%)                                                                                               | 37.67                | -8.67                    |                                   |
| Social support (%)                                                                                                                  | 64.66                | +1.34                    |                                   |
| N                                                                                                                                   | 293                  | 293                      |                                   |

**Appendix Table A3:** The relationship between individual characteristics and precarity

|                     | <b>Outcome variable: <i>Double Precarity<sub>i</sub></i></b> |                     |                     |                     |                    |                   |
|---------------------|--------------------------------------------------------------|---------------------|---------------------|---------------------|--------------------|-------------------|
|                     | I                                                            | II                  | III                 | IV                  | V                  | VI                |
| Female              | 1.148<br>(0.248)                                             | 1.153<br>(0.249)    | 0.98<br>(0.218)     | 1.153<br>(0.190)    | 0.998<br>(0.271)   | 1.127<br>(0.358)  |
| Migrant             | 6.804***<br>(2.027)                                          | 7.289***<br>(2.192) | 3.356***<br>(1.154) | 3.003***<br>(1.150) | 2.241<br>(1.101)   | 3.197*<br>(1.970) |
| Age                 | 0.957***<br>(0.011)                                          | 0.952***<br>(0.011) | 0.953***<br>(0.010) | 0.956***<br>(0.007) | 0.957**<br>(0.019) | 0.968*<br>(0.017) |
| Low education       |                                                              | 1.996**<br>(0.579)  |                     | 2.139***<br>(0.531) | 0.823<br>(0.297)   | 1.084<br>(0.626)  |
| Low income          |                                                              |                     | 7.423***<br>(1.700) |                     |                    |                   |
| Country of birth FE | N                                                            | N                   | N                   | Y                   | N                  | Y                 |
| Sector employed FE  | N                                                            | N                   | N                   | N                   | Y                  | Y                 |
| N                   | 586                                                          | 586                 | 586                 | 586                 | 422                | 422               |
| Brant test          | 0.340                                                        | 0.206               | 0.823               | 0.206               | 0.206              | 0.206             |

Notes: Ordered logit regressions, odd ratios reported. The outcome variable, *Double Precarity<sub>i</sub>* (job + housing precarity) ranges between 0 and 2. The explanatory variables are indicated in the first column. Standard errors clustered at the sector of employment level. Given that the low education and low income dummy variables are likely to be collinear, we control only for one of them (low education) when we add country of birth and sector of employment fixed effects (FE), cols IV-VI.

**Appendix Table A4:** The relationship between mental health, precarity and COVID-19 exposure

|                          | <b>Outcome variable: <i>Mental health worse<sub>i</sub></i></b> |         |          |          |          |
|--------------------------|-----------------------------------------------------------------|---------|----------|----------|----------|
|                          | I                                                               | II      | III      | IV       | V        |
| Double precarity         |                                                                 | 2.360*  | 2.385**  |          |          |
|                          |                                                                 | (1.043) | (1.059)  |          |          |
| Housing precarity        |                                                                 |         |          | 2.358*   |          |
|                          |                                                                 |         |          | (1.059)  |          |
| Job precarity            |                                                                 |         |          |          | 0.441    |
|                          |                                                                 |         |          |          | (0.331)  |
| Exposure to COVID shocks | 2.747***                                                        |         | 2.732*** | 2.732*** | 2.746*** |
|                          | (0.750)                                                         |         | (0.800)  | (0.800)  | (0.750)  |
| Sector employed FE       | Y                                                               |         | Y        | Y        | Y        |
| N                        | 538                                                             |         | 538      | 538      | 538      |
| Brant test               | 0.397                                                           |         | 0.656    | 0.397    | 0.250    |

Notes: Ordered logit regressions, odd ratios reported. The outcome variable, *Mental health worse<sub>i</sub>*, (worsening of mental health in wave 1 and/or 2) ranges between 0 and 2. The explanatory variables are indicated in the first column. All regressions control for: gender, migrant status and age. Standard errors clustered at the sector of employment level. FE stands for fixed effects.
